# Supplementary material
Source: HighWire-hosted journal article supplement (https://rmdopen.bmj.com/content/9/1/e002871)

## SUPPLEMENTARY

## Supplementary 1: Disease-Modifying Antirheumatic Drug (DMARD) Therapy

| AZ           |    |              |    |              |    |              |    |              |    |              |    |
|--------------|----|--------------|----|--------------|----|--------------|----|--------------|----|--------------|----|
| csDMARD      |    |              |    | bDMARD       |    |              |    | tsDMARD      |    |              |    |
| Withhold (n) |    | Continue (n) |    | Withhold(n)  |    | Continue (n) |    | Withhold (n) |    | Continue (n) |    |
| MTX          | 7  | MTX          | 9  | ADA          | 3  | ADA          | 2  | BARI         | 3  | BARI         | 1  |
| MTX + HCQ    | 2  | MTX + HCQ    | 3  | ETA          | 2  | ETA          | 1  | TOF          | 4  | TOF          | 3  |
|              | 2  |              | 1  |              | 1  |              | 2  | TOF +        | 3  | TOF +        | 3  |
| MTX + SSZ    |    | SSZ          |    | GOL          |    | GOL          |    | MTX          |    | MTX          |    |
| MTX + IXE    | 0  | MTX + IXE    | 1  | IXE          | 2  | IXE          | 3  | UPA          | 5  | UPA          | 8  |
| MTX + SEC    | 0  | MTX + SEC    | 1  | SEC          | 2  | SEC          | 3  |              |    |              |    |
| MTX + TOC    | 1  | MTX + TOC    | 1  | TOC          | 1  | TOC          | 4  |              |    |              |    |
|              |    |              |    | UST          | 0  | UST          | 2  |              |    |              |    |
| TOTAL        | 12 |              | 16 |              | 11 |              | 17 |              | 15 |              | 15 |
| Pfizer       |    |              |    |              |    |              |    |              |    |              |    |
| csDMARD      |    |              |    | bDMARD       |    |              |    | tsDMARD      |    |              |    |
| Withhold (n) |    | Continue (n) |    | Withhold (n) |    | Continue (n) |    | Withhold (n) |    | Continue (n) |    |
| LEF          | 1  | LEF          | 1  | ADA          | 4  | ADA          | 5  | BARI         | 4  | BARI         | 4  |
|              | 7  |              | 8  |              |    |              | 2  | BARI +       | 1  | BARI +       | 1  |
| MTX          |    | MTX          |    | CTZ          |    | CTZ          |    | MTX          |    | MTX          |    |
| MTX + HCQ    | 4  | MTX + HCQ    | 3  | ETA          | 1  | ETA          | 1  | TOF          | 3  | TOF          | 2  |
|              | 1  |              | 3  |              | 0  |              | 1  | TOF +        | 0  | TOF +        | 0  |
| MTX + SSZ    |    | MTX + SSZ    |    | GOL          |    | GOL          |    | MTX          |    | MTX          |    |
| MTX + ETA    | 0  | MTX + ETA    | 1  | GUS          | 1  | GUS          | 0  | UPA          | 7  | UPA          | 7  |
|              | 1  |              | 0  |              | 1  |              | 1  | UPA +        | 0  | UPA +        | 1  |
| MTX + SEC    |    | MTX + SEC    |    | INF          |    | INF          |    | MTX          |    | MTX          |    |
| MTX + TOC    | 0  | MTX + TOC    | 0  | IXE          | 4  | IXE          | 5  |              |    |              |    |
|              |    |              |    | SEC          | 2  | SEC          | 1  |              |    |              |    |
|              |    |              |    | TOC          | 2  | TOC          | 2  |              |    |              |    |
|              |    |              |    | UST          | 0  | UST          | 1  |              |    |              |    |
| TOTAL        | 14 |              | 16 |              | 15 |              | 20 |              | 15 |              | 15 |

MTX, methotrexate; HCQ, hydroxychloroquine; SSZ, sulfasalazine; LEF, leflunamide; ADA, adalimumab; CTZ, certolizumab; ETA, etanercept; GOL, golimumab; GUS, guselkumab; INF, infliximab; IXE, ixekizumab; SEC, secukinumab; TOC, tocilizumab, UST, ustekinumab; BARI, baricitinib; TOF, tofacitinib; UPA, upadacitinib.

Supplementary Table 2: Comparing withhold versus continue therapy within DMARD classes

|                                              | csDMARD               |                       |         | bDMARD               |                      |         | tsDMARD              |                      |              |
|----------------------------------------------|-----------------------|-----------------------|---------|----------------------|----------------------|---------|----------------------|----------------------|--------------|
|                                              | Withhold              | Continue              | p-value | Withhold             | Continue             | p value | Withhold             | Continue             | p value      |
| <b>Detectable SARS-CoV2 IgG Antibodies †</b> |                       |                       |         |                      |                      |         |                      |                      |              |
| 6-month blood test                           | 13/13<br>(100)        | 21/22<br>(95.5)       | 1.00    | 18/21<br>(85.7)      | 26/27<br>(96.3)      | 0.306   | 22/25<br>(88.0)      | 22/26<br>(84.6)      | 1.00         |
| Post booster blood test                      | 15/15<br>(100)        | 28/28<br>(100)        |         | 19/19<br>(100)       | 25/25<br>(100)       |         | 24/24<br>(100)       | 25/25<br>(100)       |              |
| <b>Mean SARS-CoV2 IgG Ab Titre ‡</b>         |                       |                       |         |                      |                      |         |                      |                      |              |
| 6-month blood test                           | 10.1<br>(6.5-12.9)    | 5.8 (2.3-13)          | 0.260   | 7.7 (1.5-19)         | 2.6 (1.4-9.4)        | 0.205   | 3.9 (2.2-14.7)       | 2.1 (1.0-4.1)        | <b>0.024</b> |
| Post booster blood test                      | 196.8<br>(88.5-426.4) | 129.5<br>(75.4-289.4) | 0.240   | 96.1<br>(55.0-145.6) | 93.2<br>(55.7-241.8) | 0.639   | 97.8<br>(72.5-197.3) | 74.7<br>(36.7-156.5) | 0.307        |

† Using Fisher's exact test with significance cut off 5%.

‡ Using Wilcoxon-Mann-Whitney Test with significance cut off 5%.

Data are presented as proportions (%) or Median (IQR)

**\*Everyone seroconverted on the post booster bloods (reason for no p values here)**

**Supplementary Table 3:** Factors influencing serum SARS-Cov2 IgG Antibody Titres at 6 months post vaccination\*

| Variable                                          | Unadjusted        |              | Adjusted          |              |
|---------------------------------------------------|-------------------|--------------|-------------------|--------------|
|                                                   | OR (95% CI)       | p value      | OR (95% CI)       | p value      |
| Age                                               | 0.95 (0.93-0.97)  | <b>0.000</b> | 1.02 (0.96-1.09)  | 0.523        |
| Sex:                                              |                   |              |                   |              |
| <i>Male</i>                                       | Ref               |              |                   |              |
| <i>Female</i>                                     | 1.66 (0.88-3.15)  | 0.118        |                   |              |
| Smoking Status:                                   |                   |              |                   |              |
| <i>Non smoker</i>                                 | Ref               |              |                   |              |
| <i>Current smoker</i>                             | 0.56 (0.16-1.97)  | 0.369        |                   |              |
| <i>Ex-smoker</i>                                  | 0.65 (0.29-1.48)  | 0.308        |                   |              |
| Immunosuppression:                                |                   |              |                   |              |
| <i>bDMARD</i>                                     | Ref               |              | Ref               |              |
| <i>cDMARD</i>                                     | 0.97 (0.41-2.33)  | 0.953        | 4.12 (0.94-17.98) | 0.06         |
| <i>tsDMARD</i>                                    | 0.38 (0.17-0.88)  | <b>0.023</b> | 0.72 (0.15-3.37)  | 0.672        |
| Trial arm:                                        |                   |              |                   |              |
| <i>Continue</i>                                   | Ref               |              | Ref               |              |
| <i>Withhold</i>                                   | 2.89 (1.42-5.87)  | <b>0.003</b> | 1.84 (0.58-5.88)  | 0.303        |
| Vaccine received                                  |                   |              |                   |              |
| <i>Astra Zeneca</i>                               | Ref               |              | Ref               |              |
| <i>Pfizer</i>                                     | 3.43 (1.84-6.41)  | <b>0.000</b> | 0.23 (0.04-1.30)  | 0.096        |
| Total IgG Antibody titre post second vaccine dose | 1.05 (1.04-1.07)  | <b>0.000</b> | 1.07 (1.04-1.10)  | <b>0.000</b> |
| IMID                                              |                   |              |                   |              |
| <i>Ankylosing Spondylitis</i>                     | Ref               |              |                   |              |
| <i>Psoriatic Arthritis</i>                        | 0.66 (0.18-2.40)  | 0.527        |                   |              |
| <i>Rheumatoid Arthritis</i>                       | 0.35 (0.10-1.17)  | 0.089        |                   |              |
| <i>SLE/Sjogren's/CTD</i>                          | 1.87 (0.15-23.40) | 0.625        |                   |              |

\*Using logistic regression analysis with outcomes based on serum IgG titre cut point 7 U/ml. Significance cut off 5%.

**Supplementary Figure 1**

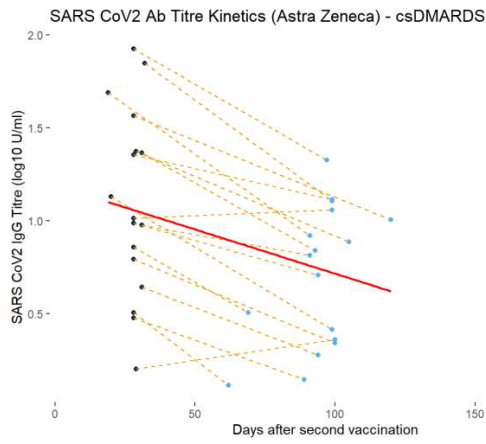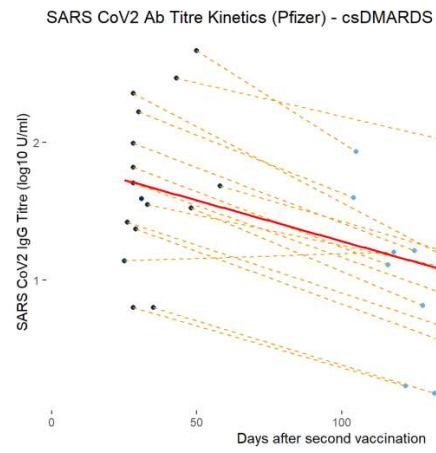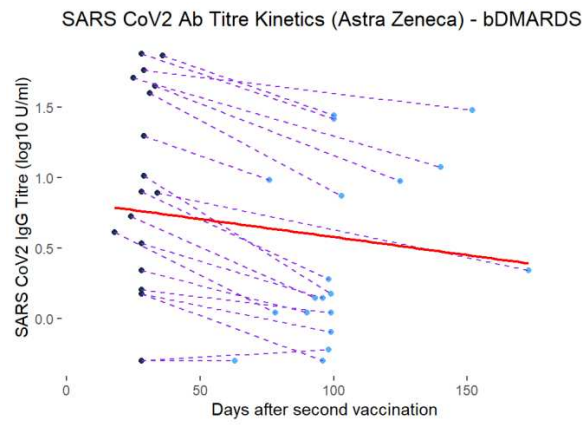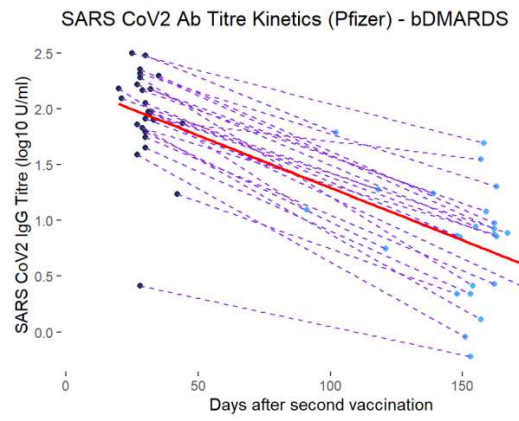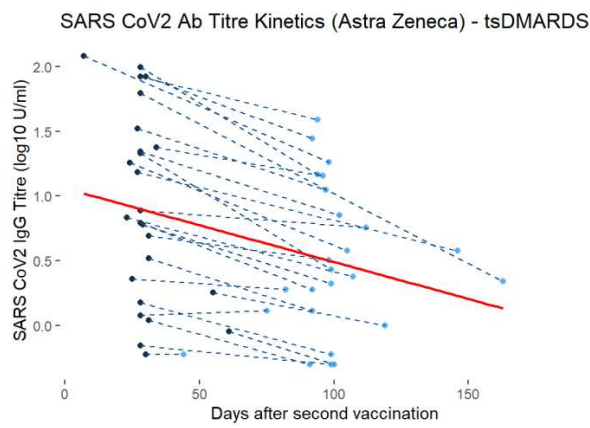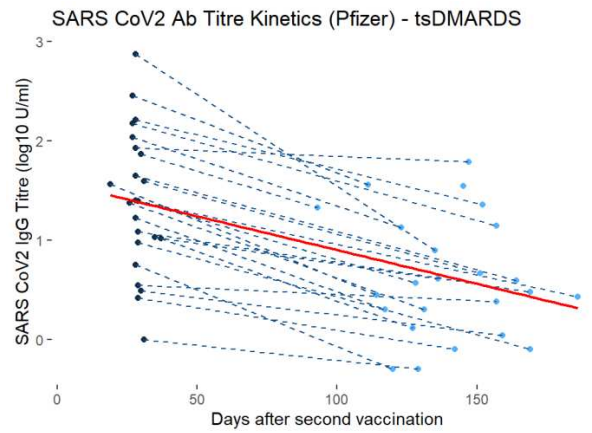

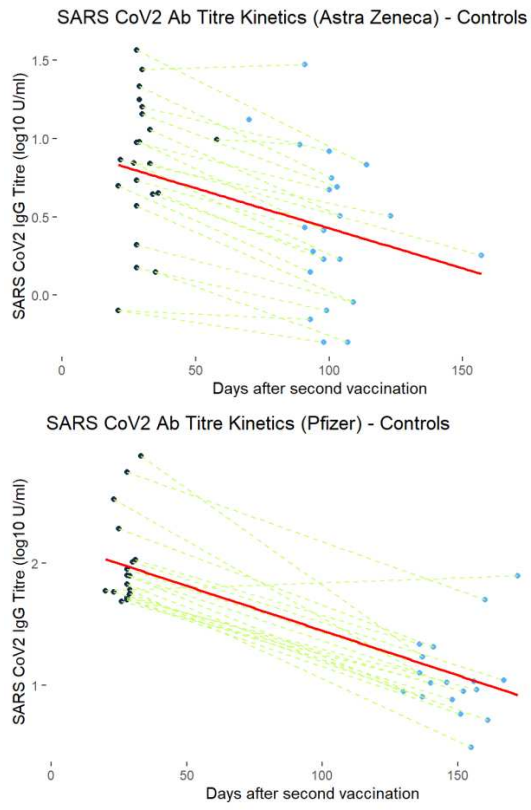

Supplement: inline-supplementary-material-1 [file inline-supplementary-material-1.pdf]
